# Supplementary material for: Halopseudomonas species: Cultivation and molecular genetic tools
Source: PubMed Central journal article supplement — Microb Biotechnol. 2023 Nov 22;17(1):e14369. doi: 10.1111/1751-7915.14369 (PMC10832565; doi:10.1111/1751-7915.14369), 2023-11-22
Supplement: MBT2-17-e14369-s001.pdf [file MBT2-17-e14369-s001.pdf]

## Supplementary Methods

### Bacterial strains and plasmids

All bacterial strains, plasmids and oligonucleotides that were used in this study are listed in

**Table S1: Bacterial strains, plasmids and oligonucleotides used in this study.**

| strain / plasmid / sequence                                      | features, sequences                                                                                                                                                                                                                           | references                  |
|------------------------------------------------------------------|-----------------------------------------------------------------------------------------------------------------------------------------------------------------------------------------------------------------------------------------------|-----------------------------|
| <b>bacterial strains</b>                                         |                                                                                                                                                                                                                                               |                             |
| <i>E. coli</i> DH5 $\alpha$                                      | <i>F</i> <sup>-</sup> $\phi$ 80 <i>lacZ</i> $\Delta$ M15 $\Delta$ ( <i>lacZYA-argF</i> )U169 <i>recA1 endA1 hsdR17 phoA supE44 thi-1 gyrA96 relA1 deoR</i>                                                                                    | Hanahan, 1983               |
| <i>E. coli</i> DH5 $\alpha$ $\lambda$ pir                        | $\lambda$ pir phage lysogen of DH5 $\alpha$                                                                                                                                                                                                   | Penfold and Pemberton, 1992 |
| <i>E. coli</i> S17-1                                             | <i>Ec294::[RP4-2(Tc<sup>R</sup>::Mu)(Km<sup>R</sup>::Tn7)]recA, thi, pro, hsdR<sup>-</sup> hsdM<sup>+</sup> TPR<sup>R</sup>, Sm<sup>R+</sup></i>                                                                                              | Simon et al., 1983          |
| <i>E. coli</i> S17.-1 $\lambda$ pir                              | $\lambda$ pir phage lysogen of S17-1                                                                                                                                                                                                          | Simon et al., 1983          |
| Stellar <sup>TM</sup> chemically competent cells                 | <i>F</i> <sup>-</sup> , <i>endA1, supE44, thi-1, recA1, relA1, gyrA96, phoA, <math>\Phi</math>80d lacZ</i> $\Delta$ M15, $\Delta$ ( <i>lacZYA - argF</i> ) U169, $\Delta$ ( <i>mrr - hsdRMS - mcrBC</i> ), $\Delta$ <i>mcrA</i> , $\lambda$ - | Takara Bio Inc, Japan       |
| <i>H. aestusnigri</i> VGXO14                                     | wilde-type                                                                                                                                                                                                                                    | Sánchez et al., 2014        |
| <i>H. bauzanensis</i> BZ93                                       | wild-type                                                                                                                                                                                                                                     | Zhang et al., 2011          |
| <i>H. litoralis</i> 2SM5                                         | wild-type                                                                                                                                                                                                                                     | Pascual et al., 2012        |
| <i>H. oceani</i> KX20                                            | wild-type                                                                                                                                                                                                                                     | Wang and Sun, 2016          |
| <i>H. aestusnigri</i> VGXO14R                                    | wild-type, spontaneous Rif <sup>R</sup> -variant                                                                                                                                                                                              | this study                  |
| <i>H. bauzanensis</i> BZ93R                                      | wild-type, spontaneous Rif <sup>R</sup> -variant                                                                                                                                                                                              | this study                  |
| <i>H. litoralis</i> 2SM5R                                        | wild-type, spontaneous Rif <sup>R</sup> -variant                                                                                                                                                                                              | this study                  |
| <i>H. oceani</i> KX20R                                           | wild-type, spontaneous Rif <sup>R</sup> -variant                                                                                                                                                                                              | this study                  |
| <i>H. litoralis</i> Tn7-P <sub>em7</sub> - <i>msfgfp</i>         | Rif <sup>R</sup> , Tn7: P <sub>em7</sub> , <i>msfgfp</i> , Gm <sup>R</sup>                                                                                                                                                                    | this study                  |
| <i>H. litoralis</i> Tn7-P <sub>tac/lacI</sub> - <i>mcherry</i>   | Rif <sup>R</sup> , Tn7: <i>lacI</i> , <i>Ptacl</i> , <i>msfgfp</i> , Km <sup>R</sup>                                                                                                                                                          | this study                  |
| <i>H. litoralis</i> Tn7.1-P <sub>tac/lacI</sub> - <i>mcherry</i> | Rif <sup>R</sup> , Tn7.1: <i>lacI</i> , <i>Ptacl</i> , <i>msfgfp</i> , Km <sup>R</sup> ; Tn7.2: P <sub>em7</sub> ,                                                                                                                            | this study                  |
| Tn7.2-P <sub>em7</sub> - <i>msfgfp</i>                           | <i>msfgfp</i> , Gm <sup>R</sup>                                                                                                                                                                                                               |                             |
| <b>plasmids</b>                                                  |                                                                                                                                                                                                                                               |                             |
| pBG13                                                            | Km <sup>R</sup> , Gm <sup>R</sup> , <i>ori R6K</i> , pBG-derived, P <sub>em7</sub>                                                                                                                                                            | Zobel et al., 2015          |
| pBNT- <i>mcherry</i>                                             | pBBR1-MCS-derivative, Km <sup>R</sup> , P <sub>nagAa/nagR</sub> , with EcoRI/XbaI inserted <i>mcherry</i>                                                                                                                                     | Hogenkamp et al., 2021      |
| pBTBX-2-mcs                                                      | pBBR1-MCS2-derivative, Km <sup>R</sup> , P <sub>araBAD/araC</sub> , mcs                                                                                                                                                                       | Prior et al., 2010          |
| pBTBX- <i>sfgfp</i>                                              | pBBR1-MCS2-derivative, Km <sup>R</sup> , P <sub>araBAD/araC</sub> , with InFusion inserted <i>sfgfp</i>                                                                                                                                       | this study                  |
| pJT <sup>+</sup> Tmcs                                            | Amp <sup>R</sup> , Gm <sup>R</sup> , P <sub>tac</sub> , mcs, non-mobilisable                                                                                                                                                                  | Verhoef et al., 2010        |
| pJT <sup>+</sup> Tmcs- <i>mcherry</i>                            | Amp <sup>R</sup> , Gm <sup>R</sup> , P <sub>tac</sub> , <i>mcherry</i> , non-mobilisable                                                                                                                                                      | Burmeister et al., 2019     |
| pTNS2                                                            | pUC18R6KT-derivative with EcoRI/ClaI inserted P <sub>lac</sub> - <i>tnasABCD</i>                                                                                                                                                              | Choi et al., 2005           |
| pUC18R6KT-miniTn7T-Km                                            | pUC18R6KT-miniTn7T-derivative, Amp <sup>R</sup> , Km <sup>R</sup>                                                                                                                                                                             | Choi et al., 2005           |
| pUC18R6KT-miniTn7T-Km-P <sub>tac/lacI</sub> - <i>mcherry</i>     | pUC18R6KT-miniTn7T-derivative, Amp <sup>R</sup> , Km <sup>R</sup> , <i>lacI</i> , P <sub>tac</sub> - <i>mcherry</i>                                                                                                                           | this study                  |

| strain / plasmid / sequence | features, sequences                                                                                                                                                                                                         | references                                        |
|-----------------------------|-----------------------------------------------------------------------------------------------------------------------------------------------------------------------------------------------------------------------------|---------------------------------------------------|
| pVLT33-GFPmut3              | pVLT33-derivative, Km <sup>R</sup> , <i>lacI</i> , P <sub>tac</sub> <i>gfpmut3</i>                                                                                                                                          | Hogenkamp et al., 2021                            |
| pYT-P <sub>em7</sub> -eYFP  | pYT-derivative, Km <sup>R</sup> , Gm <sup>R</sup> , P <sub>em7</sub> , <i>eyfp</i>                                                                                                                                          | Weihmann et al., 2023; A. Sieberichs, unpublished |
| pHT01-sfGFP                 | pHT01-derivative, Cm <sup>R</sup> , Amp <sup>R</sup> , <i>lacI</i> , P <sub>grac</sub> - <i>sfgfp</i>                                                                                                                       | Hogenkamp et al., 2021                            |
| oligonucleotides            |                                                                                                                                                                                                                             |                                                   |
| (1) IF_sfGFP_pBTBX_fw       | binds at the 5'end of the <i>sfgfp</i> gene on pHT01-sfGFP, inserts homologous region for InFusion® cloning.<br>5'-GATATACCCATGGGCATGAGCAAAGGAG<br>AAGAACTTTTCACTG                                                          | this study                                        |
| (2) IF_sfGFP_pBTBX_rev      | binds at the 3'end of the <i>sfgfp</i> gene on pHT01-sfGFP, inserts homologous region for InFusion® cloning.<br>5'-<br>TTCGTTGACGAATTTTCATTTGTAGAGCTCAT<br>CCATG                                                            | this study                                        |
| (3) pBTBX_fw                | binds at the 3'end of the plasmid pBTBX-2-mcs downstream MCS, inserts homologous region for InFusion® cloning.<br>5'-GTTCTAGAAAATTCGTCAACGAATTCAAG<br>CT                                                                    | this study                                        |
| (4) pBTBX_rev               | binds at the 5'end of the plasmid pBTBX-2-mcs upstream MCS, inserts homologous region for InFusion® cloning.<br>5'-GCCCATGGGTATATCTCCTTCTTAAAG                                                                              | this study                                        |
| (5) IF_Ptac_pUC18R6K_fw     | binds at the 5'end of <i>lacI</i> P <sub>tac</sub> region on pVLT33, inserts homologous region for InFusion® cloning and <i>KpnI</i> site for further exchanges.<br>5'-GCCTGCAAGGCCTTCGCGAGGTACCTC<br>ACTGC CCGCTTTCAGTCGG  | this study                                        |
| (6) IF_Ptac_pUC18R6K_rev    | binds at the 3'end of <i>lacI</i> P <sub>tac</sub> region on pVLT33, inserts homologous region for InFusion® cloning and <i>KpnI</i> site for further exchanges.<br>5'-TCGAGAAGCTTGGGCCCGGTACCAATTGT<br>TATCCGCTCACAATTCCAC | this study                                        |
| (7) IF_RBS-mCherry-mTn7_fw  | binds at the 5'end of <i>mcherry</i> gene on pJT <sup>T</sup> mcs, inserts homologous region for InFusion®.<br>5'-ACCGGGCCCAAGCTTCTCGATTACACA<br>GGAAACAGGAGGTACC                                                           | this study                                        |
| (8) IF_RBS-mCherry-mTn7_rev | binds at the 3'end of <i>mcherry</i> gene on pJT <sup>T</sup> mcs, inserts homologous region for InFusion®.<br>5'-GGGCTGCAGGAATTCCTCGATTACTTGT<br>ACAGCTCGTCCATGCCG                                                         | this study                                        |
| (9) attTn7_pBG13_fw         | binds within <i>msfgfp</i> gene for proving genetic integration.<br>5'-CCGATCCTGGTTGAACTGGATG                                                                                                                               | this study                                        |
| (10) attTn7_pUC_fw          | binds within <i>Km<sup>R</sup></i> gene for proving genetic integration.<br>5'- CAGGACATAGCGTTGGCTAC                                                                                                                        | this study                                        |
| (11) pTn7R_fw               | binds within the Tn7R recognition site.<br>5'-CACAGCATAACTGGACTGATTTC                                                                                                                                                       | Choi and Schweizer, 2006                          |
| (12) 2SM5_glmS1_rev         | binds specifically in <i>glmS1</i> gene of <i>H. littoralis</i> 2SM5 ( <i>BLU11_RS05420</i> ) for proving genetic integration.<br>5'-TCAAGCATGGGCCATTGGCG                                                                   | this study                                        |

| strain / plasmid / sequence | features, sequences                                                                                                                                        | references |
|-----------------------------|------------------------------------------------------------------------------------------------------------------------------------------------------------|------------|
| (13) 2SM5_glmS2_rev         | binds specifically in <i>glmS1</i> gene of <i>H. littoralis</i> 2SM5 ( <i>BLU11_RS05420</i> ) for proving genetic integration.<br>5'- AACATGGCCCTCTGGCACTG | this study |

Recombinant DNA techniques were applied as described by Sambrook et al. (1989) using DH5 $\alpha$ , or in the case of an expression vector harbouring an *oriR6K*, DH5 $\alpha$   $\lambda$ pir was used. The construction of expression vectors was either carried out via restriction and ligation cloning or InFusion<sup>®</sup> Cloning (Takara Bio Europe, St Germain en Laye, France). For pBTBX-sfGFP, the insert was generated by amplifying the *sfgfp* gene on pHT01-sfGFP with oligos 1 and 2. The plasmid pBTBX-2-mcs, a gift from Ryan Gill (Addgene plasmid # 26068), was amplified using oligos 3 and 4. PCR fragments were assembled via InFusion<sup>®</sup> Cloning (Takara Bio Europe, St Germain en Laye, France). pUC18R6KT-miniTn7T-Km-Ptac/lacI-mCherry was constructed by first amplifying the *lacI*-P<sub>lac</sub> fragment encoded on pVLT33 using oligos 5 and 6. The pUC18R6KT-miniTn7T-Km vector, which was a gift from Herbert Schweizer (Addgene plasmid # 64969; <http://n2t.net/addgene:64969>; RRID: Addgene\_64969) was linearised via restriction with KpnI. Thus, the two fragments were assembled using InFusion<sup>®</sup> Cloning (Takara Bio Europe, St Germain en Laye, France). In a second step, the *mcherry* sequence, including the P<sub>lac</sub> RBS, was amplified using oligos 7 and 8 and was assembled with XhoI linearised pUC18R6KT-miniTn7T-Km-P<sub>lac</sub> vector via InFusion<sup>®</sup> Cloning (Takara Bio Europe, St Germain en Laye, France).

### ***oriC* sequence *H. littoralis* 2SM5**

location of *oriC* in : [LT629748.1](#): 3507165 – 3507739 nt (575 nt)

```
CTTCAGATACCTGAGTAATTCACGACAGAGCCGCTAAGCCCTTTCAAGGGATCGGGAAT
TCTAGAGAAGAAGCGGGCTCAGGTCAATTTGAATTCTCAGTAGGTAGATAAATAACAATA
CAAAGAAAAGATTTTTTAAAAGATTATGTATGTAGATCTTAATGAGGAAGGGATTTTCTGTG
GATAAGGGGGCCCACGCCAGATAGGCCGCTCGATTGCCGAGAGCACAACCTCGGTGAG
TAAATTGTTACAGAGGGGCATCATCCATTGTGCAGCCCCTGTGGATAACAGGTCTTGAT
ATCCACAGGGGGATTTATCCCCTGTTTTCACTCCCGTTTGCCAACAGACTGATACAGAC
```

CTTGTCCACAAGGCTCATGCTGCCGGTTTTACAAGGACGAGCGCTGATAAATGCAACGT  
AATTCAGGCGCAAGAGCCTCGGGCGATCCTATCTGTGATGTGGATAAGTAAGGGGGGA  
AAGGCTAGAATGACGGGTGTTTCCCCGGGGCTGACGAGTGCTGCTTCGGGGAAGGTTT  
TTATCAACAACCTCGAGCCGCTCAGGCTTGGAGTCGGGGGAATTCA

***oriC* sequences *B. mallei* ATCC23344**

location of *oriC* in : [LT629748.1](#): 3,006,500-3,006,897 nt (398 nt)

ACCGCCCGCGGCCGGCGCACGCTCGCCATCCGGGCAATCGCACGACGCACCGCGAC  
GGCGCTCGGCGATACGCGGAAGCGACATCCTCACAGATACGCCGGCCGGTTATCCAC  
GTCACCCTGTGGATAACCGCGCAAATTCGACCCAATCGCTGTGCAACCGATGTGGA  
CGTAAACGGGGTAACTCCGCACGGCCGCACAGACCCGAAAAAGTTGCCATTGAAACC  
CTGTGCGGGCAAACAGGCTGTGCGTCCGGTTATGCGCCCCGCAAGTGATGATCCGG  
CGGCGTAAACGCCGGTTATCCACAGAAAAACGGGTGTCTTGTTAACTCTTACTACGTAT  
GTATACAGGTTTACCTCAAGATAAAGAGGCCTACCTCCACGATCGGCCACCGT

location of *oriC*: 3,055,348-3,055,787 nt (440 nt)

GCGCAAGCCCTTCGATGCTGCGGCGCGACGGGTCGAATTTGCGCAAACACGACTAAAC  
AGGGCGTAAGCGCCCGTCCGATGGCACTCTTATGCTTGTCAAGACTTGACTTATGCACA  
TTTTCTCGTTGCAGCGCGGTAGAGGGCGGCATCGGCGAGCGGGCCGCGCTATGACG  
GCGGAAATCGGATAGCAGCCTTGCCGGACAAGGCTTCCCGGGTTGCCCGCCCAATCG  
GGAAAAAGCAGTGGGTGGCCGGATGCAGCGCCATTTGCGGGCCGTCAAGGGCGAGTT  
CTCAACAAAGTTATCCACAGGATCGGCGAGCGCGCCGCGATTCTTAATGAGAATCCAAA  
ACTTAGCGCCGAAAGTGACGTTTCACTTAACTTACGGGCGTCGCGGATATCCGGCCT  
GCCGGGCCTGTGCGCATTCCGGCGGTGCCGCACCG

## Supplementary Data

### Growth of *Halopseudomonas* spp. under typical laboratory conditions

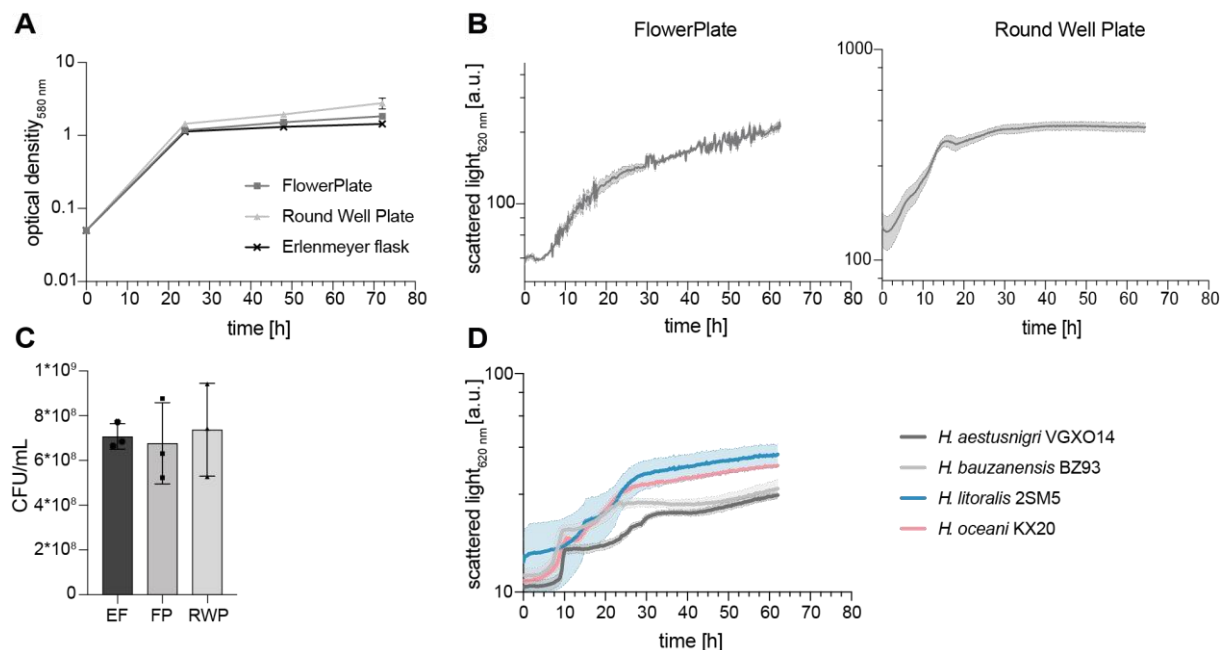

**Figure S1: Elucidation of different cultivation vessels on bacterial growth.**

**A+C:** Shown is exemplarily the growth of *H. bauzanensis* BZ93 when cultivated in LB-Medium at 30 °C and 130 rpm in an Erlenmeyer flask (EF, black cross), 1000 rpm in a Flower Plate® (FP, dark grey square) or Round Well Plate® (RWP, light grey triangle). **A:** Samples of each culture were taken every 24 h for 72 h to determine the optical density at 580 nm. **B:** Main cultures were inoculated with the same pre-cultures and then cultivated in different BioLector I systems to compare the growth behaviour using an FP or RWP. **C:** After 24 h of cultivation, samples were taken from each cultivation vessel and plated on agar plates for CFU measurements. **D:** Growth of *H. aestusnigri* VGXO14, *H. bauzanensis* BZ93, *H. litoralis* 2SM5, and *H. oceani* KX20 cultivated in LB medium in Round Well Plates. The shown data represent the mean of biological triplicates. The calculated standard deviations are either indicated by shadows or error bars

The optical density and the CFU measurements showed no differences in using different cultivation vessels. The growth curves showed differences instead. Application of FlowerPlates® led to jagged growth curves and aggregate formation within the cultures, whereas the aggregate formation was reduced and the growth curve smoother when using a Round Well Plate®. The differences in the arbitrary units as a measure for light scattering are due to the use of different BioLector devices. The biomass (scattered light intensity) at 620 nm at gain 30 is shown in both cases. That there are no differences in living cells is proven by CFU measurements. Multiphasic growth can be observed within all *Halopseudomonas* indicating a subsequent metabolism of complex media carbon sources and therewith the need for further improvement.

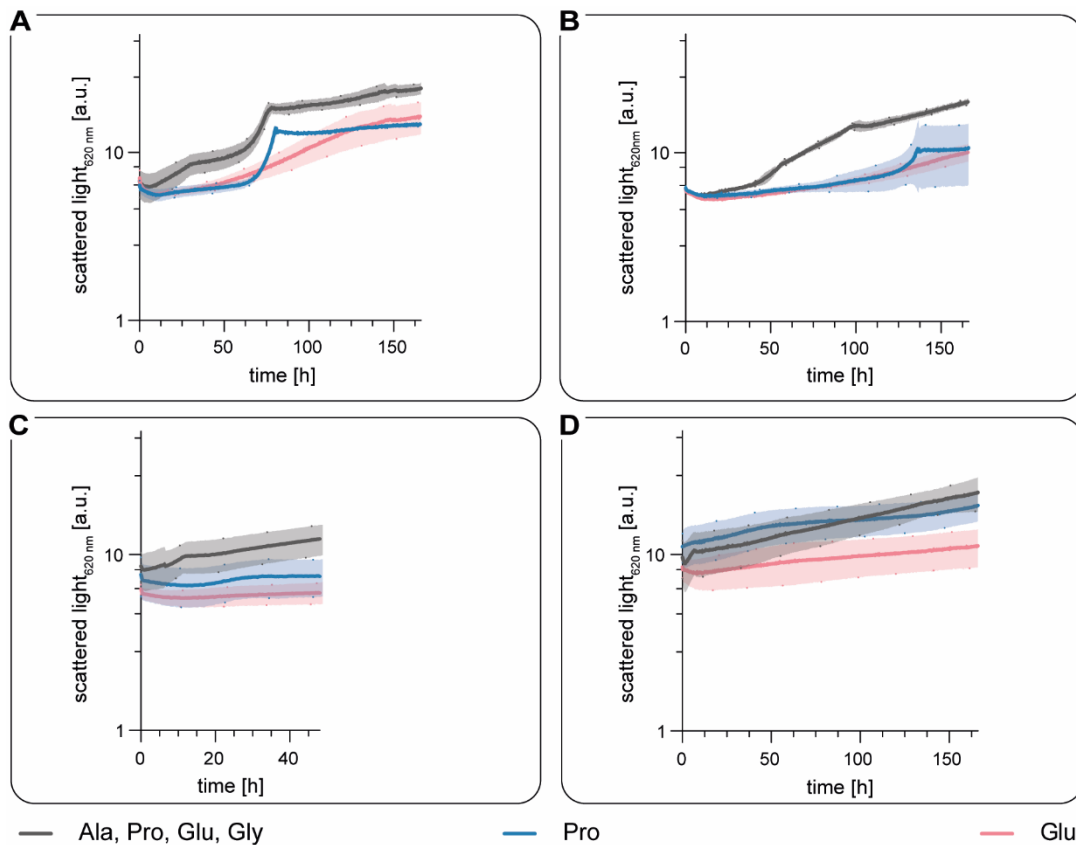

**Figure S2: Multiphasic growth on a defined amino acid cocktail.**

*H. aestusnigri* VGXO14R (A), *H. bauzanensis* BZ93R (B), *H. litoralis* 2SM5R (C), and *H. oceani* KX20R (D) from pre-cultures grown in LB medium were cultivated in Round Well Plates® in HM medium supplemented with a mixture of the amino acids DL-alanine, L-proline, L-glutamine, and glycine (dark grey), with L-proline (blue), or L-glutamine (red), as single carbon source. The shown data represent the mean of a biological duplicate or triplicate. Cultivation was pursued until all cultures of a species achieved the stationary phase, or maximal 160 h. The calculated standard deviations are indicated by shadows.

DL-alanine, L-proline and L-glutamine were deduced from the carbon source utilisation profiles (Figure S4) as suitable carbon sources to create model amino acid mix mimicking the major component cocktail of LB broth accessible for the growth of the *Halopseudomonas* species; glycine, which was not part of the carbon profiling, was additionally selected. All amino acids were applied in C-equimolar concentrations to 0.6 g/L DL-alanine. Cultures on single amino acids showed monophasic growth behaviour, whereas the mixture led to multiphasic growth; thus indicating, a subsequent metabolism of the available carbon sources. Notably, non of the investigated strains was able to metabolise glycine (not shown).

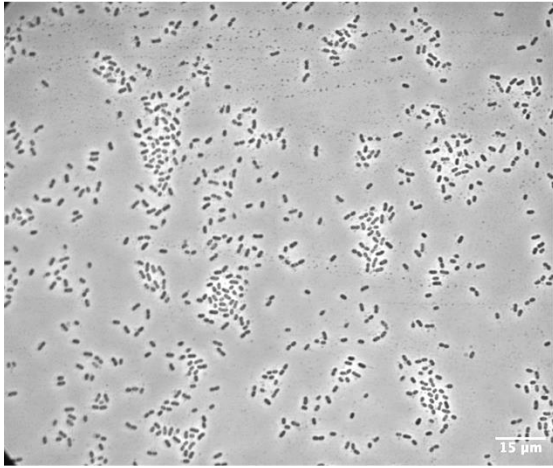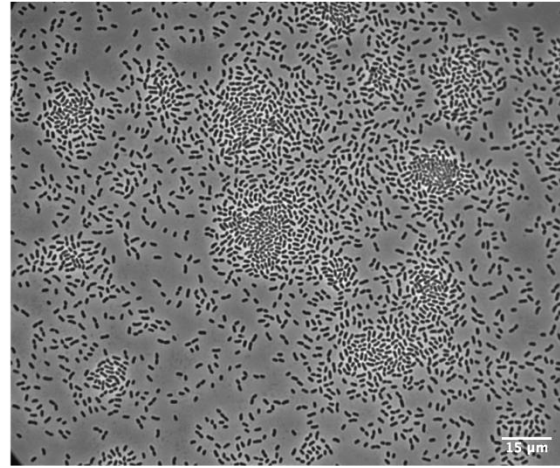

**Figure S3: Phase contrast microscopy images of *H. litoralis* 2SM5 (left) and *H. oceani* KX20 (right).** A zoom-in of these pictures is shown in Figure 1. The images were taken of motile bacteria from stationary phase culture showing tendency to aggregate. A scale bar of 15 μm is shown.



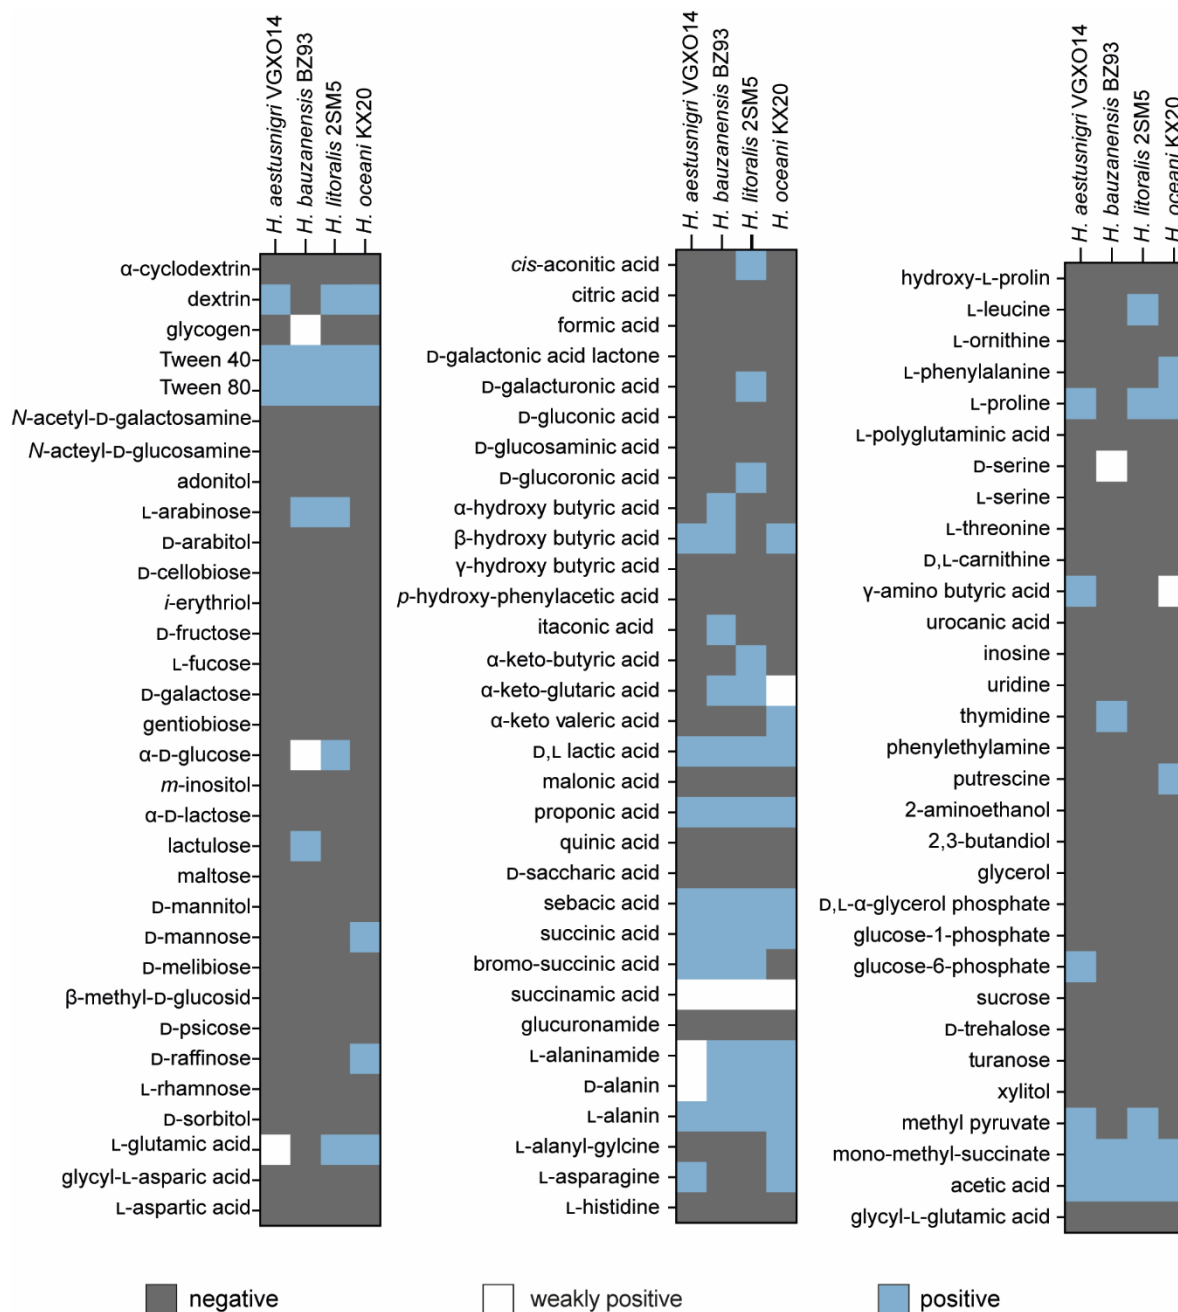

**Figure S4: Carbon source utilisation profiles of *H. aestusnigri* VGXO14, *H. bauzanensis* BZ93, *H. litoralis* 2SM5 and *H. oceani* KX20 according to previous studies.**

The data shown represents a summary of the carbon sources that can be utilized by the four *Halopseudomonas* species, according to the information from the respective strain type descriptions. The profiles were determined using API (Analytical Profile Index) 20 tests or Biolog phenotyping microplates. (Zhang *et al.*, 2011; Pascual *et al.*, 2012; Sánchez *et al.*, 2014; Wang and Sun, 2016). The terminology to categorize growth strength (“negative”, “weakly positive”, “positive”) is given as stated in the respective original publications. In the present study, the spectrum is extended by showing growth on malonic acid, glutaric acid, pimelic acid, azelaic acid, adipic acid and suberic acid (table 1).

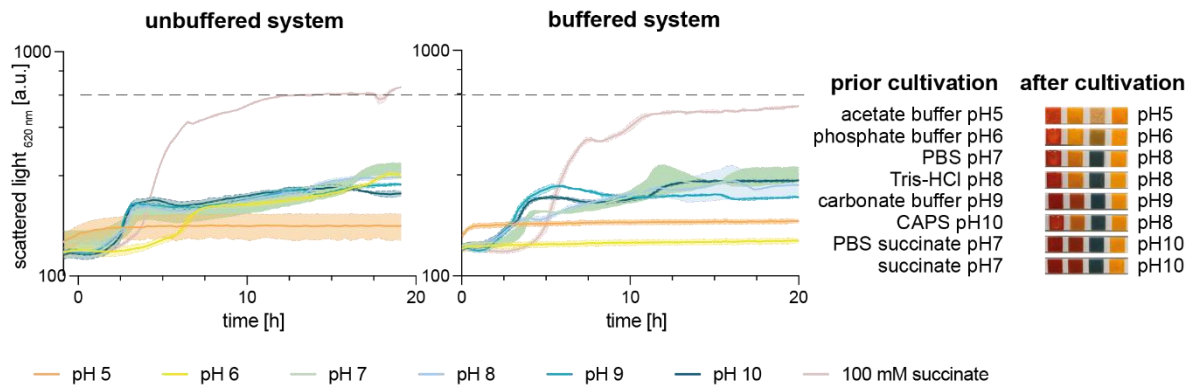

**Figure S5: Determination of the effect of pH on bacterial growth.**

*H. littoralis* 2SM5 was cultivated in LB medium adjusted to pH values from 5 – 10. In one experimental setup, unbuffered systems were used; in another, buffered systems with 100 mM of buffer component. In the latter, acetate buffer was used to adjust pH5, phosphate buffer for pH6, PBS for pH7, Tris-HCl for pH8, carbonate buffer for pH9, and CAPS for pH10. For comparison, 100 mM succinic acid supplementation was tested with (PBS, pH7) and without buffer. The shown data represent the mean of a biological triplicate. Shadows indicate the calculated standard deviation. The adjusted pH values before and after the cultivation are shown on the right hand. The displayed data represent the mean of a biological triplicate. Shadows indicate the calculated standard deviation.

The comparison of *H. littoralis* cultivated in an unbuffered and buffered LB-Medium showed that the bacteria did not grow faster at basic pH values. Thus, growth improvement could be tracked down to the addition of the succinic acid improved the growth behaviour, even though the buffer capacity of 100 mM was still not suitable to keep a steady pH.

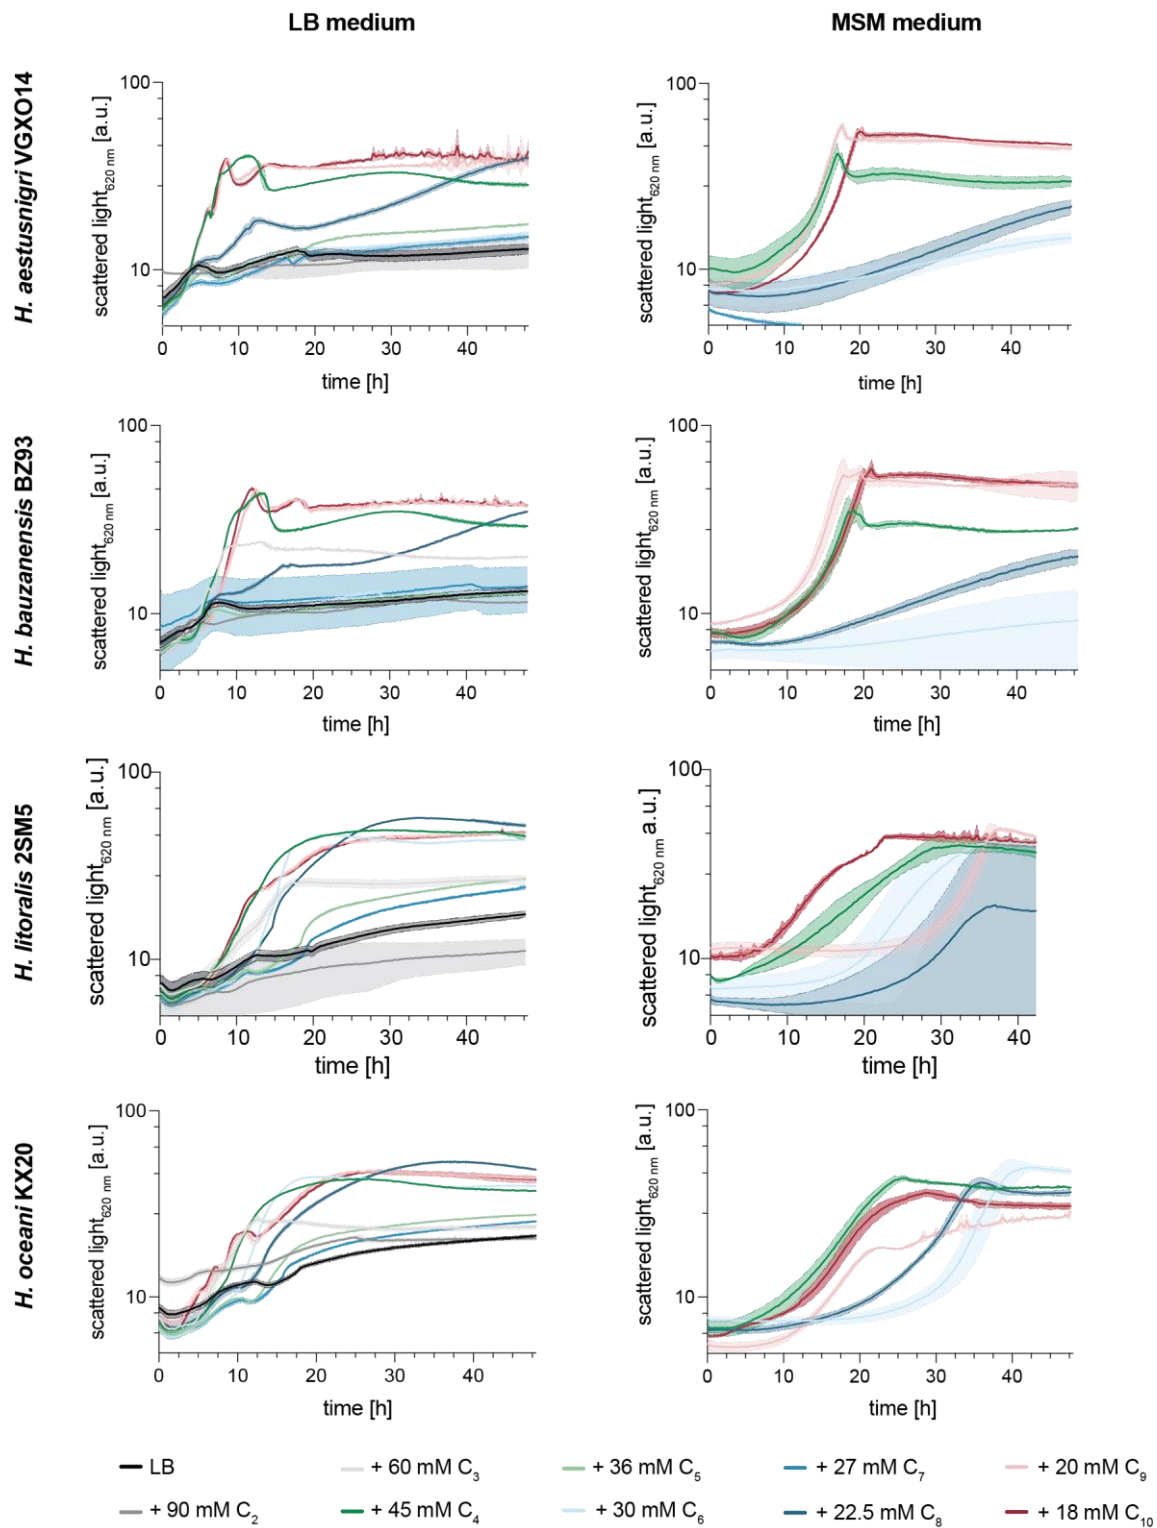

**Figure S6: Growth curves of *H. aestusnigri* VGXO14, *H. bauzanensis* BZ93, *H. litoralis* 2SM5, and *H. oceanai* KX20 summarised in Table 1.**

The C<sub>2</sub> – C<sub>10</sub> dicarboxylic acids were tested in C-equimolar concentrations to 45 mM succinic acid and were used as an additional carbon source in LB medium and as sole carbon sources in MSM medium. The shown data represent the mean of a biological triplicate. Shadows indicate the calculated standard deviation.

**Table S2: Homologue proteins to enzymes described for dicarboxylic acid degradation in *A. baylyi* ADP1.**

\*,\*\* identical protein

| Protein | <i>H. aestusnigri</i>          |         | <i>H. bauzanensis</i>          |         | <i>H. litoralis</i>             |         | <i>H. oceani</i>              |         |
|---------|--------------------------------|---------|--------------------------------|---------|---------------------------------|---------|-------------------------------|---------|
|         | Locus-tag                      | % ident | Locus-tag                      | % ident | Locus-tag                       | % ident | Locus-tag                     | % ident |
| DcaK    | <a href="#">B7O88_RS06080</a>  | 19      | <a href="#">BMY02_RS03645*</a> | 26      | <a href="#">BLU11_RS07280**</a> | 24      |                               |         |
| DcaP    |                                |         | <a href="#">WP_218144722.1</a> | 22      |                                 |         |                               |         |
| MucK    | <a href="#">WP_200818422.1</a> | 24      | <a href="#">BMY02_RS03645*</a> | 29      | <a href="#">BLU11_RS07280**</a> | 24      | <a href="#">C1949_RS05600</a> | 21      |
| DcaI    | <a href="#">B7O88_RS07895</a>  | 25      | <a href="#">BMY02_RS10000</a>  | 47      | <a href="#">BLU11_RS15730</a>   | 48      |                               |         |
| DcaJ    |                                |         | <a href="#">BMY02_RS10005</a>  | 47      | <a href="#">BLU11_RS15510</a>   | 47      |                               |         |
| DcaA    | <a href="#">B7O88_RS16455</a>  | 35      | <a href="#">BMY02_RS10200</a>  | 79      | <a href="#">BLU11_RS06175</a>   | 80      | <a href="#">C1949_RS01775</a> | 35      |
| DcaE    | <a href="#">B7O88_RS01040</a>  | 39      | <a href="#">BMY02_RS13030</a>  | 44      | <a href="#">BLU11_RS12290</a>   | 42      | <a href="#">C1949_RS02560</a> | 39      |
| DcaH    | <a href="#">B7O88_RS11070</a>  | 47      | <a href="#">BMY02_RS16220</a>  | 48      | <a href="#">BLU11_RS15865</a>   | 47      | <a href="#">C1949_RS00785</a> | 47      |
| DcaF    | <a href="#">B7O88_RS11065</a>  | 68      | <a href="#">BMY02_RS16215</a>  | 66      | <a href="#">BLU11_RS15870</a>   | 66      | <a href="#">C1949_RS00790</a> | 68      |

## Unlocking the genome of Halopseudomonads for engineering purposes

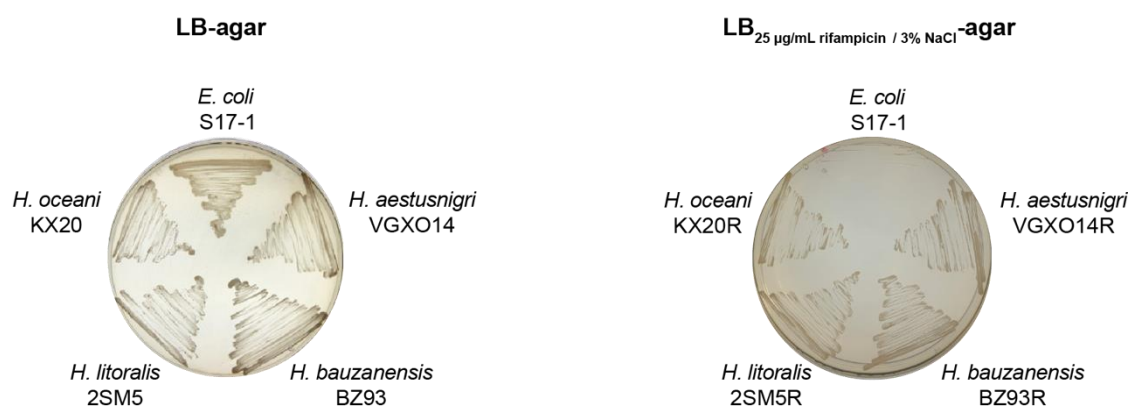

**Figure S7: Isolation of Rif<sup>R</sup> Strains.**

Growth of *H. aestusnigri* VGXO14R, *H. bauzanensis* BZ93R, *H. litoralis* 2SM5R, *H. oceanii* KX20R, and *E. coli* S17-1 on LB-agar and LB agar containing 25 µg/mL Rif and 3% (w/v) NaCl.

Several colonies of each species were plated on LB-agar containing 25 µg/mL rifampicin (Rif); grown colonies were plated again to confirm rifampicin resistance. The resulting strains were termed *H. aestusnigri* VGXO14R, *H. bauzanensis* BZ93R, *H. litoralis* 2SM5R, and *H. oceanii* KX20R, respectively. To counteract spontaneously occurring Rif-resistant cells of the *E. coli*-donor strain, we exploited the pronounced osmotolerance of *Halopseudomonas* spp. by using LB agar plates containing Rif and 3% (w/v) NaCl, which impaired the donor's growth.

**Table S3: Replicability of different origins of replication in selected *Halopseudomonas* strains.**

The replicability of an *oriV* is indicated by +. Non-replicable *oriV*s are indicated by -.

| <i>oriV</i> | Plasmid backbone      | <i>H. aestusnigri</i> | <i>H. bauzanensis</i> | <i>H. litoralis</i> | <i>H. oceanii</i> |
|-------------|-----------------------|-----------------------|-----------------------|---------------------|-------------------|
| RO1600      | pJT <sup>+</sup> Tmcs | +                     | +                     | +                   | +                 |
| RSF1010     | pVLT33                | +                     | +                     | +                   | +                 |
| pBBR1       | pBTBX-2-mcs           | +                     | +                     | +                   | +                 |
| pMB1        | pYT                   | +                     | +                     | +                   | +                 |
| R6K         | pUC18R6KT             | -                     | -                     | -                   | -                 |

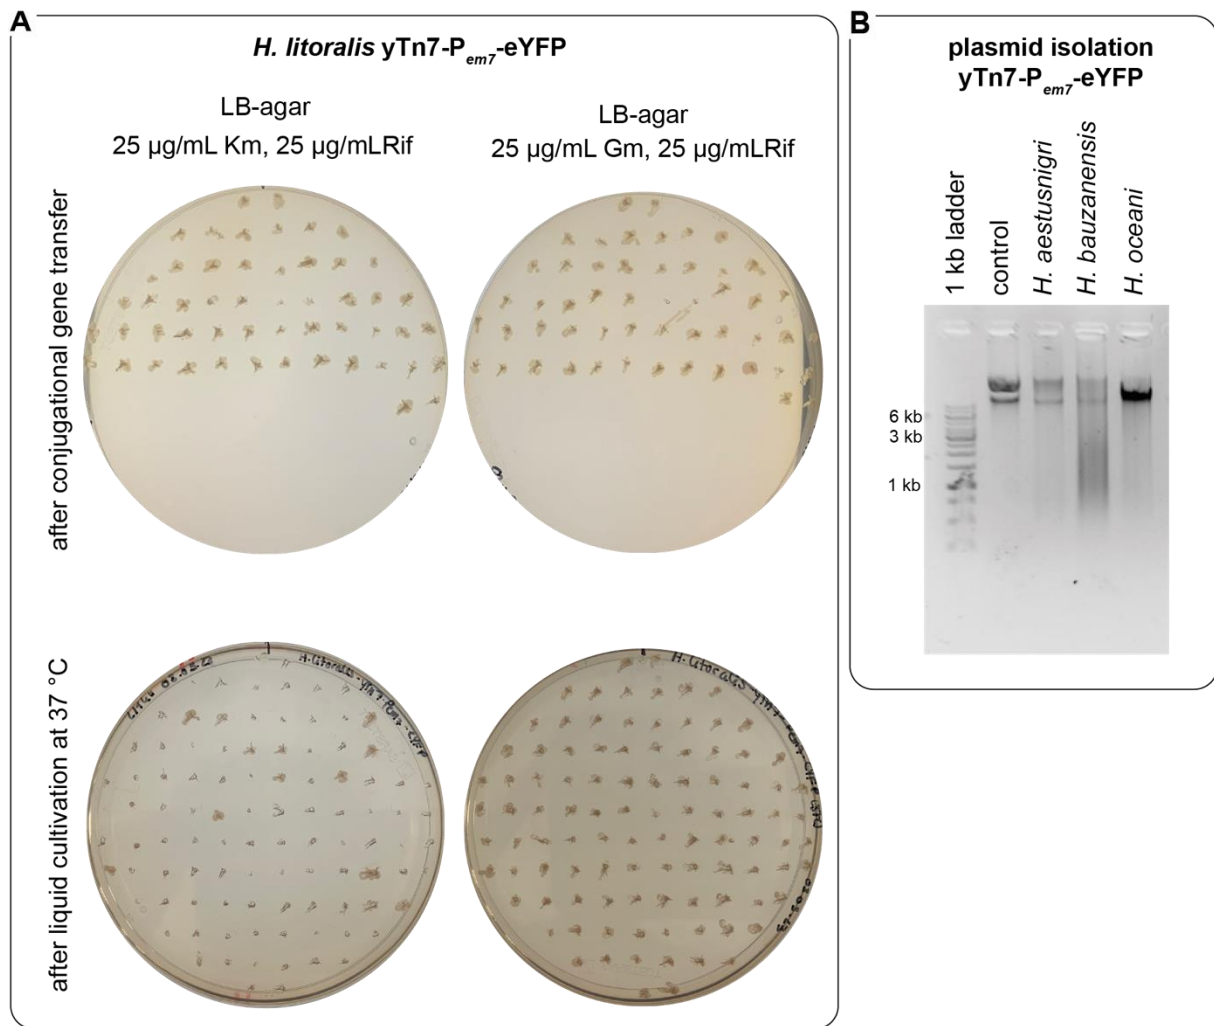

**Figure S8: Conjugational transfer, transposition and plasmid curing of *H. littoralis* 2SM5R using the pMB1 plasmid yTn7-P<sub>em7</sub>-eYFP.**

**A:** The upper row shows the selection plates for *H. littoralis* yTn7-P<sub>em7</sub>-eYFP on LB-agar containing the antibiotics rifampicin and kanamycin (vector backbone marker) and rifampicin and gentamycin (transposon marker), respectively. The second row shows colonies grown on the same selection plates after a heat stress treatment, incubating at 37 °C for 24 h. **B:** The isolated plasmids of yTn7-P<sub>em7</sub>-eYFP from cultures of *H. aestusnigri*, *H. bauzanensis*, and *H. littoralis* grown in the presence of kanamycin after the transformation with the respective plasmid are shown. Control: yTn7-P<sub>em7</sub>-eYFP isolated from *E. coli*

The plasmid yTn7-P<sub>em7</sub>-eYFP harbours a pMB1 origin of replication typically replicated in *E. coli*. *H. littoralis* transformed with this plasmid is resistant towards kanamycin and gentamycin, which resistance-conferring genes are encoded in the backbone and integration cassette, respectively, thus, indicating that the plasmid was maintained. This was confirmed by the isolation of this plasmid (**Figure S8B**). Cultivation in LB medium under gentamycin selection pressure at 37 °C for 24 h induced this transposition, which can be seen by the loss of kanamycin resistance and was also confirmed via sequencing analysis.

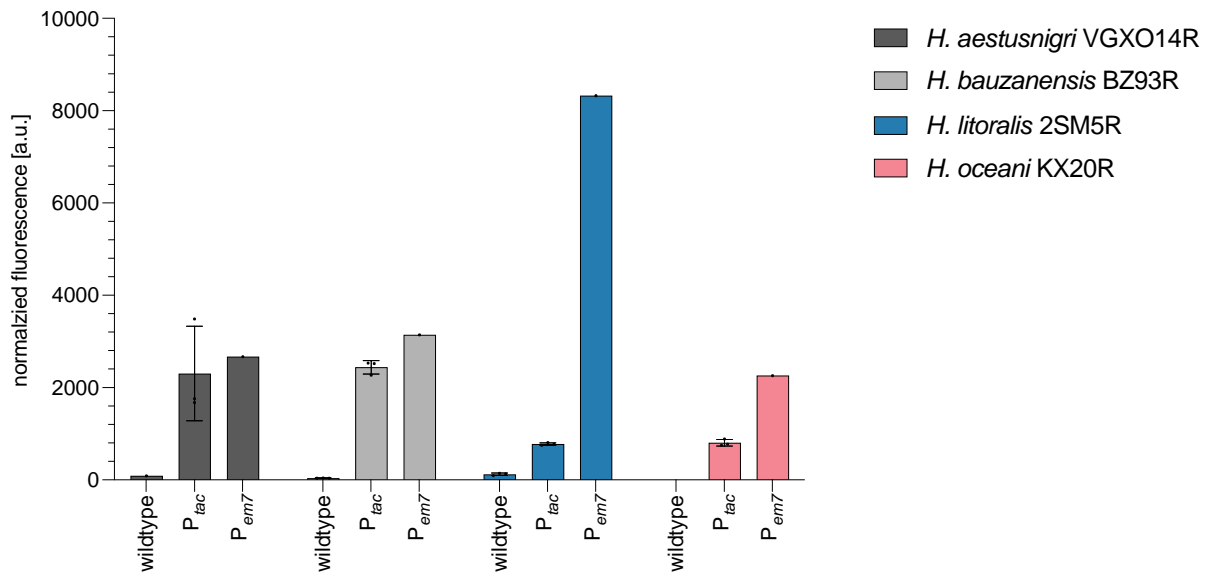

**Figure S9: Normalised fluorescence signals of *H. aestusnigri* VGXO14R, *H. bauzanensis* BZ93R, *H. litoralis* 2SM5R, and *H. oceani* KX20R harbouring constitutive expression systems.**

The used plasmids were pJT'Tmcs-*mcherry* (P<sub>tac</sub>) and pYT-P<sub>em7</sub>-*eYFP* (P<sub>em7</sub>). Shown here is the normalised fluorescence intensity of one sample out of a biological triplicate (P<sub>em7</sub>) and the mean and standard deviation of a biological triplicate (P<sub>tac</sub>) after 24 h of cultivation.

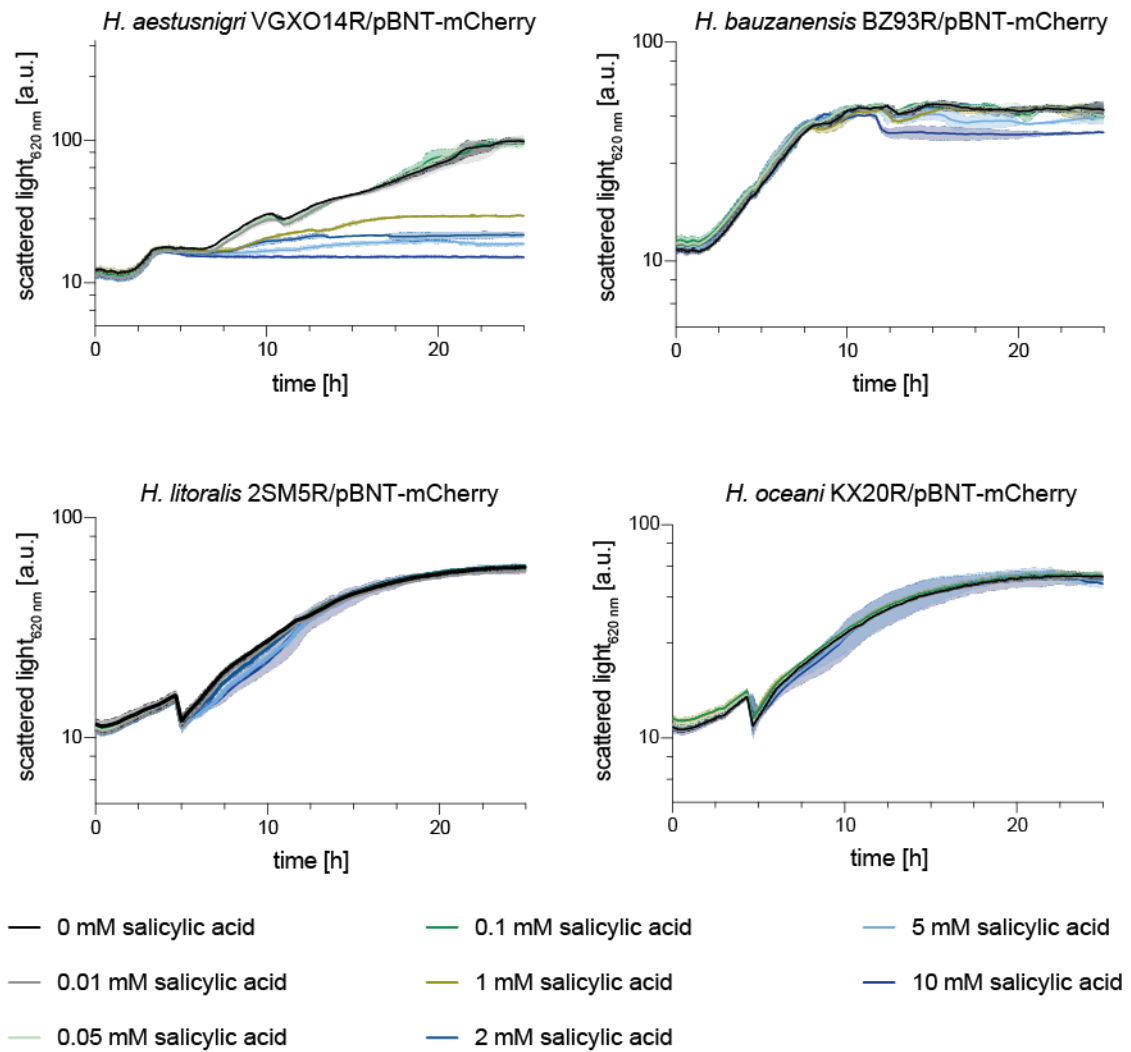

**Figure S10: Growth curves of *H. aestusnigri* VGXO14R, *H. bauzanensis* BZ93R, *H. litoralis* 2SM5R, and *H. oceani* KX20R harbouring pBNT-mCherry with different concentrations of salicylic acid.**

Increasing concentrations of the inducer salicylic acid (0 – 10 mM) were added to the cultures after 4.5 h of cultivation. The bacterial growth was monitored using the BioLector I system. 0 mM salicylic acid: black; 0.01 mM salicylic acid: grey; 0.05 mM salicylic acid: pale green; 0.1 mM salicylic acid: green; 1 mM salicylic acid: olive; 2 mM salicylic acid: blue; 5 mM salicylic acid: light blue; 10 mM salicylic acid: dark blue. The shown data represent the mean of a biological triplicate. Shadows indicate the calculated standard deviation.



## Chromosomal integration of reporter genes by Tn7 transposition

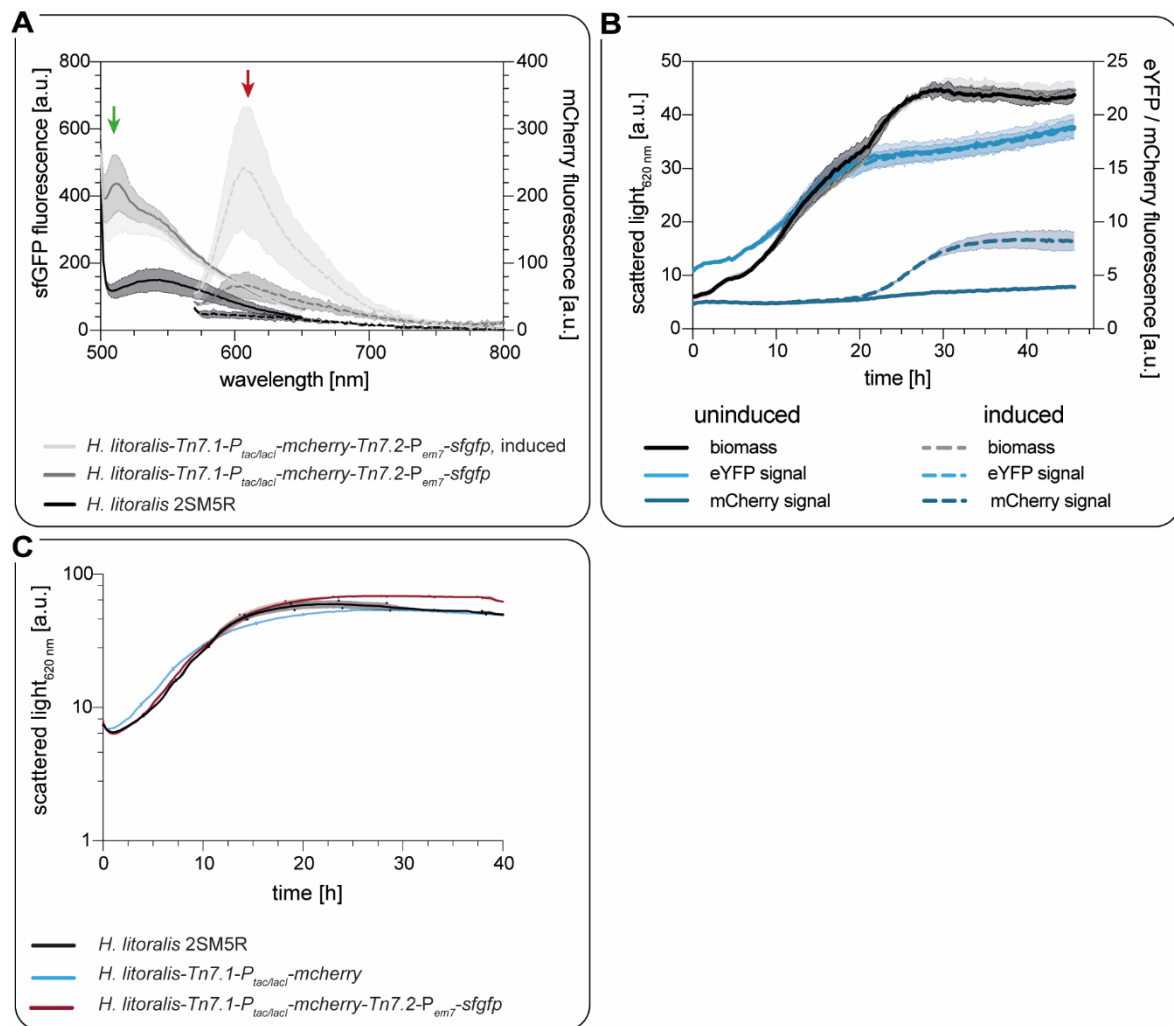

**Figure S11: Emission spectra and growth profiles of three *H. litoralis* 2SM5R yTn7.1- $P_{em7}$ -sfGFP- $P_{tac/lacI}$ -mCherry after induction of *mcherry* gene expression.**

**A:** sfGFP (continuous line, green arrow) and mCherry (dotted line, red arrow) emission spectra of *H. litoralis* Tn7.1- $P_{em7}$ -sfGFP-Tn7.2- $P_{tac}$ -mCherry after the induction with IPTG (light grey), the control (dark grey) and wild type as control (black). **B:** The biomass of *H. litoralis* (black, continuous line) as well as *H. litoralis* Tn7.1- $P_{em7}$ -sfGFP-Tn7.2- $P_{tac}$ -mCherry (grey, dotted line), as well as the sfGFP fluorescence (light blue, Tn7.1-site) and the mCherry fluorescence (dark blue, Tn7.2-site), were measured with a microbioreactor system (BioLector I). The cultures were induced with 50  $\mu$ M IPTG (+, dashed line) after 4.5 h of cultivation. The respective dotted line shows the wild-type controls. **C:** Growth comparison of the cultures of *H. litoralis* supplemented with 50  $\mu$ M IPTG shown in Figure 4C, D without (black) or with one (blue), and two (red) *attTn7*-sites occupied. The data represent the mean of biological triplicates, and error bars or shadows indicate the calculated standard deviation.

The experimental setup in Figure S11B was the same as for the data shown in Figure 4 (main part). However, for 4 of 45 clones in this repeated experiment, the behaviour shown here was observed. The supplementation of IPTG leads to an induction of *mcherry* gene expression only 16 h after induction. In contrast, the GFP signal correlates with the biomass signal, as to be expected from a constitutively expressed gene, which was not observed in the other cultures (exemplarily shown in **Figure 4**, main part).

## Supplementary References

- Burmeister, A., Hilgers, F., Langner, A., Westerwalbesloh, C., Kerkhoff, Y., Tenhaef, N., et al. (2019) A microfluidic co-cultivation platform to investigate microbial interactions at defined microenvironments. *Lab Chip* **19**: 98–110.
- Choi, K.H., Gaynor, J.B., White, K.G., Lopez, C., Bosio, C.M., Karkhoff-Schweizer, R.A.R., and Schweizer, H.P. (2005) A Tn7-based broad-range bacterial cloning and expression system. *Nat Methods* **2**: 443–448.
- Choi, K.H. and Schweizer, H.P. (2006) mini-Tn7 insertion in bacteria with single *attTn7* sites: Example *Pseudomonas aeruginosa*. *Nat Protoc* **1**: 153–161.
- Hanahan, D. (1983) Studies on transformation of *Escherichia coli* with plasmids. *J Mol Biol* **166**: 557–580.
- Hogenkamp, F., Hilgers, F., Knapp, A., Klaus, O., Bier, C., Binder, D., et al. (2021) Effect of photocaged isopropyl- $\beta$ -D-1-thiogalactopyranoside solubility on the light responsiveness of LacI-controlled expression systems in different bacteria. *ChemBioChem* **22**: 539–547.
- Pascual, J., Lucena, T., Ruvira, M.A., Giordano, A., Gambacorta, A., Garay, E., et al. (2012) *Pseudomonas litoralis* sp. nov., isolated from mediterranean seawater. *Int J Syst Evol Microbiol* **62**: 438–444.
- Penfold, R.J. and Pemberton, J.M. (1992) An improved suicide vector for construction of chromosomal insertion mutations in bacteria. *Gene* **118**: 145–146.
- Prior, J.E., Lynch, M.D., and Gill, R.T. (2010) Broad-host-range vectors for protein expression across Gram negative hosts. *Biotechnol Bioeng* **106**: 326–332.
- Sambrook, J., Fritsch, E., and Maniatis, T. (1989) *Molecular Cloning: A Laboratory manual*, 4th Edition. Cold Spring Harbor Laboratory Press.
- Sánchez, D., Mulet, M., Rodríguez, A.C., David, Z., Lalucat, J., and García-Valdés, E. (2014) *Pseudomonas aestusnigri* sp. nov., isolated from crude oil-contaminated intertidal sand samples after the prestige oil spill. *Syst Appl Microbiol* **37**: 89–94.
- Simon, R., Priefer, U., and Puhl, A. (1983) A broad host range mobilization system for *in vivo* genetic engineering: transposon mutagenesis in Gram negative bacteria. *Nat Biotechnol* **1**: 784–791.
- Verhoef, S., Ballerstedt, H., Volkers, R.J.M., De Winde, J.H., and Ruijssenaars, H.J. (2010) Comparative transcriptomics and proteomics of p-hydroxybenzoate producing *Pseudomonas putida* S12: Novel responses and implications for strain improvement. *Appl Microbiol Biotechnol* **87**: 679–690.
- Wang, M.Q. and Sun, L. (2016) *Pseudomonas oceani* sp. nov., isolated from deep seawater. *Int J Syst Evol Microbiol* **66**: 4250–4255.
- Weihmann, R., Kubicki, S., Bitzenhofer, N.L., Domröse, A., Bator, I., Kirschen, L.-M., et al. (2023) The modular pYT vector series employed for chromosomal gene integration and expression to produce carbazoles and glycolipids in *P. putida*. *FEMS Microbes* **4**: 1–17.
- Zhang, D.C., Liu, H.C., Zhou, Y.G., Schinner, F., and Margesin, R. (2011) *Pseudomonas bauzanensis* sp. nov., isolated from soil. *Int J Syst Evol Microbiol* **61**: 2333–2337.
- Zobel, S., Benedetti, I., Eisenbach, L., De Lorenzo, V., Wierckx, N., and Blank, L.M. (2015) Tn7-Based Device for Calibrated Heterologous Gene Expression in *Pseudomonas putida*. *ACS Synth Biol* **4**: 1341–1351.
